# Supplementary material for: Synergy between TROPOMI sun-induced chlorophyll fluorescence and MODIS spectral reflectance for understanding the dynamics of gross primary productivity at integrated carbon observatory system (ICOS) ecosystem flux sites
Source: Copernicus journal article supplement (doi:10.5194/egusphere-2022-640), 2022-09-09

## Supplementary materials of

# Synergy between TROPOMI sun-induced chlorophyll fluorescence and MODIS spectral reflectance for understanding the dynamics of gross primary productivity at integrated carbon observatory system (ICOS) ecosystem flux sites

Hamadou Balde<sup>1,2</sup>, Gabriel Hmimina<sup>1</sup>, Yves Goulas<sup>1</sup>, Gwendal Latouche<sup>2</sup>, Kamel Soudani<sup>2</sup>

*Correspondence to:* Hamadou Balde (hamadou.balde@lmd.ispl.fr)

**Tab S1:** Information on the sites used in this study from the ICOS release 2018 and 2021. The PFT represents the plant functional type corresponding to each site: MF (mixed forests), CRO (croplands), DBF (deciduous broadleaf forests), EBF (evergreen broadleaf forests), ENF (evergreen needleleaf forests), GRA (grasslands), OSH (open shrublands), and WET (wetlands). Years denote the year of data flux available for each site.

| Site name | Latitude (°) | Longitude (°) | PFT | Years            |
|-----------|--------------|---------------|-----|------------------|
| BE-Bra    | 51.307617    | 4.519844      | MF  | 2018             |
| BE-Lcr    | 51.112184    | 3.850433      | CRO | 2019, 2020       |
| BE-Lon    | 50.551586    | 4.7461305     | CRO | 2019, 2020       |
| BE-Vie    | 50.305068    | 5.998052      | ENF | 2018             |
| CH-Dav    | 46.815283    | 9.855009      | ENF | 2018, 2019, 2020 |
| CZ-BK1    | 49.50213     | 18.53685      | ENF | 2018             |
| CZ-Lnz    | 48.681611    | 16.946416     | MF  | 2018             |
| CZ-Wet    | 49.024657    | 14.7703419    | WET | 2018             |
| DE-Geb    | 51.099714    | 10.914629     | CRO | 2018             |
| DE-Gri    | 50.950046    | 13.512681     | GRA | 2018, 2019, 2020 |
| DE-Hai    | 51.079189    | 10.452336     | DBF | 2018, 2019, 2020 |
| DE_HoH    | 52.086484    | 11.222468     | DBF | 2018, 2019, 2020 |
| DE-Hzd    | 50.963566    | 13.490172     | DBF | 2018             |
| DE-Kli    | 50.892881    | 13.5225056    | CRO | 2018, 2019, 2020 |
| DE-RuR    | 50.621914    | 6.3041256     | GRA | 2018             |
| DE-RuS    | 50.865912    | 6.4471689     | CRO | 2018, 2019, 2020 |
| DE-RuW    | 50.504907    | 6.33101886    | ENF | 2018             |
| DE-Tha    | 50.962631    | 13.565225     | ENF | 2018             |

|        |           |             |     |                  |      |
|--------|-----------|-------------|-----|------------------|------|
| DK-Sor | 55.485869 | 11.644644   | DBF |                  | 2018 |
| FI-Hyy | 61.84741  | 24.29477    | ENF | 2018, 2020       |      |
| FI-Sii | 61.832683 | 24.19278333 | WET | 2018, 2019, 2020 |      |
| FI-Var | 67.7549   | 29.61       | ENF | 2018, 2019, 2020 |      |
| FR-Aur | 43.54965  | 1.10615     | CRO | 2019, 2020       |      |
| FR-Bil | 44.49389  | -0.95592    | ENF | 2018, 2019, 2020 |      |
| FR-EM2 | 49.872108 | 3.02065     | CRO | 2018, 2019, 2020 |      |
| FR-Fon | 48.476339 | 2.780136    | DBF | 2018, 2019, 2020 |      |
| FR-Hes | 48.84415  | 1.951910019 | DBF |                  | 2018 |
| FR-LGt | 48.67416  | 7.06461667  | WET | 2018, 2019, 2020 |      |
| FR-Mej | 48.117707 | -1.798283   | CRO | 2019, 2020       |      |
| GF-Guy | 5.2787    | -52.9248    | EBF | 2018, 2019, 2020 |      |
| IT-BCi | 40.52375  | 14.957444   | CRO |                  | 2018 |
| IT-Cp2 | 41.704267 | 12.357293   | EBF |                  | 2018 |
| IT-Lsn | 45.740481 | 12.750297   | OSH | 2018, 2019, 2020 |      |
| IT-SR2 | 43.73203  | 10.29095    | ENF | 2018, 2019, 2020 |      |
| IT-Tor | 45.844444 | 7.578055556 | GRA | 2018, 2019, 2020 |      |
| NL-Loo | 52.16648  | 5.74355     | ENF |                  | 2018 |
| SE-Deg | 64.182    | 19.556694   | WET | 2018, 2020       |      |
| SE-Htm | 56.09763  | 13.41897    | ENF | 2018, 2019, 2020 |      |
| SE-Nor | 60.086441 | 17.479455   | ENF | 2018, 2019, 2020 |      |
| SE-Svb | 64.256097 | 19.77451111 | ENF | 2018, 2019, 2020 |      |

**Tab S2:** MODIS Terra and Aqua surface spectral reflectance bands.

| Acronym        | Full Name                              | Wavelengths (nm) | Spatial Resolution |
|----------------|----------------------------------------|------------------|--------------------|
| B <sub>1</sub> | Surface Reflectance for B <sub>1</sub> | 620-670          | 500 m              |
| B <sub>2</sub> | Surface Reflectance for B <sub>2</sub> | 841-876          |                    |
| B <sub>3</sub> | Surface Reflectance for B <sub>3</sub> | 459-479          |                    |
| B <sub>4</sub> | Surface Reflectance for B <sub>4</sub> | 545-565          |                    |

|                 |                                            |           |      |
|-----------------|--------------------------------------------|-----------|------|
| B <sub>5</sub>  | Surface Reflectance for<br>B <sub>5</sub>  | 1230-1250 |      |
| B <sub>6</sub>  | Surface Reflectance for<br>B <sub>6</sub>  | 1628-1652 |      |
| B <sub>7</sub>  | Surface Reflectance for<br>B <sub>7</sub>  | 2105-2155 |      |
| B <sub>8</sub>  | Surface Reflectance for<br>B <sub>8</sub>  | 405-420   | 1 km |
| B <sub>9</sub>  | Surface Reflectance for<br>B <sub>9</sub>  | 438-448   |      |
| B <sub>10</sub> | Surface Reflectance for<br>B <sub>10</sub> | 483-493   |      |
| B <sub>11</sub> | Surface Reflectance for<br>B <sub>11</sub> | 526-536   |      |
| B <sub>12</sub> | Surface Reflectance for<br>B <sub>12</sub> | 546-556   |      |
| B <sub>13</sub> | Surface Reflectance for<br>B <sub>13</sub> | 662-672   |      |
| B <sub>14</sub> | Surface Reflectance for<br>B <sub>14</sub> | 673-683   |      |
| B <sub>15</sub> | Surface Reflectance for<br>B <sub>15</sub> | 743-753   |      |
| B <sub>16</sub> | Surface Reflectance for<br>B <sub>16</sub> | 862-877   |      |

**Tab S3:** Detailed results and statistics of the site-specific linear relationships between GPP and SIF<sub>d</sub>. The sign  $\pm$  denotes the confidence interval on the slope and on the intercept for each relationship. R<sup>2</sup> denotes for the coefficient of determination. The units are for the slope in (gC m<sup>-2</sup> d<sup>-1</sup>/(mW m<sup>-2</sup> sr<sup>-1</sup> nm<sup>-1</sup>)), intercept in (gC m<sup>-2</sup> d<sup>-1</sup>), and RMSE (Root Mean Squared Error) in (gC m<sup>-2</sup> d<sup>-1</sup>). PFT represents the plant functional type of each site: MF (mixed forests), CRO (croplands), DBF (deciduous broadleaf forests), EBF (evergreen broadleaf forests), ENF (evergreen needleleaf forests), GRA (grasslands), OSH (open shrublands), and WET (wetlands). All pairwise linear relationships between GPP and SIF<sub>d</sub> were statistically significant with p<0.0001, except for IT-Cp2 site (p = 0.604).

| Site name | R <sup>2</sup> | Slope      | Intercept | RMSE | N   | PFT |
|-----------|----------------|------------|-----------|------|-----|-----|
| BE-Bra    | 0.59           | 11.27±1.07 | 3.33±0.45 | 2.00 | 300 | MF  |
| BE-Lcr    | 0.20           | 9.02±1.39  | 4.06±0.66 | 4.06 | 630 | CRO |
| BE-Lon    | 0.27           | 12.33±1.64 | 2.1±0.89  | 6.05 | 582 | CRO |
| BE-Vie    | 0.20           | 4.75±1.24  | 4.84±0.60 | 2.44 | 228 | ENF |
| CH-Dav    | 0.15           | 4.17±0.96  | 2.67±0.26 | 1.74 | 406 | ENF |
| CZ-BK1    | 0.35           | 18±3.62    | 5.92±0.79 | 3.38 | 178 | ENF |
| CZ-Lnz    | 0.42           | 9.98±1.25  | 4.76±0.60 | 3.18 | 346 | MF  |
| CZ-Wet    | 0.20           | 9.46±2.16  | 3.12±0.71 | 3.68 | 306 | WET |
| DE-Geb    | 0.53           | 10.04±1.18 | 2.12±0.68 | 3.80 | 254 | CRO |

|        |       |            |            |      |      |     |
|--------|-------|------------|------------|------|------|-----|
| DE-Gri | 0.28  | 8.58±0.94  | 2.89±0.38  | 3.26 | 842  | GRA |
| DE-Hai | 0.57  | 9.23±0.54  | 1.40±0.32  | 2.91 | 852  | DBF |
| DE-HoH | 0.35  | 9.29±0.79  | 3.04±0.41  | 4.14 | 1002 | DBF |
| DE-Hzd | 0.41  | 8.56±1.25  | 2.40±0.57  | 2.73 | 260  | DBF |
| DE-Kli | 0.31  | 9.05±0.89  | 1.18±0.40  | 3.85 | 886  | CRO |
| DE-RuR | 0.17  | 6.87±1.76  | 4.59±0.87  | 3.80 | 280  | GRA |
| DE-RuS | 0.29  | 17.04±1.97 | 1.81±0.80  | 6.22 | 708  | CRO |
| DE-RuW | 0.16  | 5.02±1.51  | 6.42±0.57  | 2.61 | 230  | ENF |
| DE-Tha | 0.56  | 6.43±0.68  | 3.54±0.31  | 1.61 | 280  | ENF |
| DK-Sor | 0.81  | 14.06±0.77 | 2.09±0.56  | 2.73 | 310  | DBF |
| FI-Hyy | 0.27  | 8.05±1.10  | 3.33±0.34  | 2.68 | 554  | ENF |
| FI-Sii | 0.32  | 4.01±0.40  | 1.06±0.12  | 1.10 | 850  | WET |
| FI-Var | 0.13  | 4.73±0.92  | 3.23±0.20  | 2.00 | 690  | ENF |
| FR-Aur | 0.23  | 7.98±0.97  | 1.08±0.41  | 3.65 | 908  | CRO |
| FR-Bil | 0.17  | 6.47±0.95  | 3.98±0.32  | 3.13 | 884  | ENF |
| FR-EM2 | 0.11  | 5.10±1.02  | 2.99±0.59  | 4.85 | 780  | CRO |
| FR-Fon | 0.66  | 11.91±0.53 | 2.48±0.27  | 2.71 | 986  | DBF |
| FR-Hes | 0.50  | 12.12±1.28 | 2.55±0.66  | 3.78 | 352  | DBF |
| FR-LGt | 0.43  | 8.02±0.55  | 1.76±0.22  | 2.29 | 1114 | WET |
| FR-Mej | 0.04  | 4.72±1.65  | 4.40±0.84  | 5.22 | 672  | CRO |
| GF-Guy | 0.02  | 1.86±0.91  | 10.79±0.57 | 2.63 | 774  | EBF |
| IT-BCi | 0.16  | 13.43±3.5  | 5.10±1.39  | 6.11 | 306  | CRO |
| IT-Cp2 | 0.001 | 0.36±1.37  | 9.37±0.54  | 2.01 | 190  | EBF |
| IT-Lsn | 0.54  | 8±0.36     | 2.17±0.17  | 2.10 | 1594 | OSH |
| IT-SR2 | 0.21  | 6.78±0.94  | 5.78±0.36  | 2.95 | 774  | ENF |
| IT-Tor | 0.42  | 11.31±1.02 | 2.30±0.30  | 2.83 | 646  | GRA |
| NL-Loo | 0.24  | 5.36±1.22  | 5.96±0.48  | 2.19 | 242  | ENF |
| SE-Deg | 0.35  | 2.04±0.21  | 0.61±0.06  | 0.54 | 680  | WET |
| SE-Htm | 0.29  | 6.34±0.66  | 4.70±0.30  | 2.72 | 860  | ENF |
| SE-Nor | 0.51  | 8.35±0.62  | 3.53±0.25  | 2.14 | 684  | ENF |
| SE-Svb | 0.20  | 7.61±0.93  | 3.88±0.24  | 2.75 | 1056 | ENF |

**Tab S4:** The generalized linear model results statistics (GLM). The following equation was fitted to investigate the effects of the site, year, and PFT and their interactions on the seasonal and interannual variations of SIF<sub>d</sub> and its relationship with GPP.  $SIF_d = 1 + \text{Year} + \text{Site} + \text{PFT} + \text{GPP} + \text{Year} \times \text{GPP} + \text{Site} \times \text{GPP} + \text{PFT} \times \text{GPP}$ . All pairwise linear relationships between GPP and SIF<sub>d</sub> were statistically significant with  $p < 0.001$ , except for Site×GPP interaction ( $p = 0.896$ ).

| Parameters | Estimate  | Std. Error | p-value  |
|------------|-----------|------------|----------|
| Intercept  | -3.01E+01 | 5.79E+00   | 2.00E-07 |
| Year       | 1.50E-02  | 2.87E-03   | 1.66E-07 |
| Site       | -1.06E-03 | 2.49E-04   | 2.13E-05 |
| PFT        | -1.31E-02 | 1.02E-03   | < 2e-16  |
| GPP        | 3.09E+00  | 7.60E-01   | 4.83E-05 |
| Year×GPP   | -1.52E-03 | 3.76E-04   | 5.70E-05 |
| Site×GPP   | -4.17E-06 | 3.19E-05   | 0.896    |
| PFT×GPP    | 1.88E-03  | 1.59E-04   | < 2e-16  |

**Tab S5:** Detailed results and statistics of the site-specific comparison between tower-based observed GPP against the RF predicted GPP. PFT denotes plant functional type of each site, including MF (mixed forests), CRO (croplands), DBF (deciduous broadleaf forests), EBF (evergreen broadleaf forests), ENF (evergreen needleleaf forests), GRA (grasslands), OSH (open shrublands), and WET (wetlands). R2 denotes for the coefficient of determination. The units are for the slope in ( $\text{gC m}^{-2} \text{d}^{-1}/(\text{mW m}^{-2} \text{sr}^{-1} \text{nm}^{-1})$ ), intercept in ( $\text{gC m}^{-2} \text{d}^{-1}$ ), and RMSE (Root Mean Squared Error) in ( $\text{gC m}^{-2} \text{d}^{-1}$ ). The sign  $\pm$  denotes the confidence interval on the slope and on the intercept for each linear relationship. RF-R model includes only surface spectral reflectance as explanatory variables, RF-SIF-R uses SIF<sub>d</sub> and spectral bands inputs to predict GPP, RF-SIF-VI explores SIF<sub>d</sub> and VIs as inputs, and RF-SIF-PFT establishes based on SIF<sub>d</sub>, spectral bands and vegetation type as categorical variable to estimate GPP.

| Site name | PFT | N   | RF-R           |           |            |      | RF-SIF-R       |           |            |      |
|-----------|-----|-----|----------------|-----------|------------|------|----------------|-----------|------------|------|
|           |     |     | R <sup>2</sup> | Slope     | Intercept  | RMSE | R <sup>2</sup> | Slope     | Intercept  | RMSE |
| BE-Bra    | MF  | 55  | 0.63           | 0.84±0.18 | 1.29±1.43  | 1.70 | 0.71           | 0.98±0.17 | 0.15±1.37  | 1.49 |
| BE-Lcr    | CRO | 124 | 0.92           | 1.03±0.05 | -0.14±0.47 | 1.26 | 0.90           | 1.06±0.06 | -0.39±0.54 | 1.40 |
| BE-Lon    | CRO | 111 | 0.91           | 1.03±0.06 | -0.24±0.55 | 1.93 | 0.89           | 1.09±0.07 | -0.45±0.65 | 2.22 |
| BE-Vie    | ENF | 41  | 0.82           | 1.02±0.16 | -0.07±1.04 | 1.08 | 0.70           | 1.00±0.21 | -0.20±1.43 | 1.37 |
| CH-Dav    | ENF | 95  | 0.84           | 0.95±0.09 | -0.01±0.34 | 0.79 | 0.76           | 0.87±0.10 | 0.04±0.43  | 0.98 |
| CZ-BK1    | ENF | 23  | 0.65           | 0.96±0.32 | 0.86±3.03  | 2.28 | 0.71           | 1.31±0.37 | -1.22±3.16 | 2.04 |
| CZ-Lnz    | MF  | 62  | 0.93           | 1.13±0.08 | -0.81±0.78 | 1.12 | 0.87           | 1.15±0.12 | -0.67±1.08 | 1.53 |
| CZ-Wet    | WET | 54  | 0.88           | 0.98±0.10 | -0.02±0.74 | 1.48 | 0.79           | 1.09±0.16 | -0.52±1.09 | 1.97 |
| DE-Geb    | CRO | 48  | 0.83           | 1.06±0.14 | -0.14±1.11 | 2.23 | 0.87           | 1.05±0.12 | 0.11±0.93  | 1.95 |
| DE-Gri    | GRA | 169 | 0.81           | 1.09±0.08 | -0.49±0.52 | 1.58 | 0.77           | 1.12±0.09 | -0.61±0.60 | 1.74 |
| DE-Hai    | DBF | 161 | 0.90           | 1.01±0.05 | -0.26±0.38 | 1.46 | 0.87           | 1.01±0.06 | -0.57±0.46 | 1.66 |
| DE-HoH    | DBF | 183 | 0.94           | 1.00±0.04 | -0.06±0.33 | 1.28 | 0.9            | 1.04±0.05 | -0.29±0.43 | 1.61 |
| DE-Hzd    | DBF | 61  | 0.84           | 1.03±0.12 | 0.02±0.74  | 1.43 | 0.84           | 1.14±0.13 | -0.83±0.83 | 1.44 |
| DE-Kli    | CRO | 177 | 0.88           | 1.02±0.06 | -0.58±0.35 | 1.59 | 0.83           | 1.08±0.07 | -1.12±0.47 | 1.93 |
| DE-RuR    | GRA | 61  | 0.75           | 0.95±0.14 | 0.66±1.14  | 1.82 | 0.59           | 1.05±0.23 | 0.19±1.71  | 2.33 |
| DE-RuS    | CRO | 148 | 0.79           | 0.98±0.08 | 0.68±0.77  | 3.13 | 0.74           | 0.98±0.09 | 0.82±0.87  | 3.50 |
| DE-RuW    | ENF | 46  | 0.82           | 0.96±0.14 | 0.38±1.13  | 1.14 | 0.55           | 0.94±0.26 | 0.78±2.03  | 1.78 |
| DE-Tha    | ENF | 52  | 0.78           | 0.93±0.14 | 0.61±0.90  | 1.14 | 0.68           | 0.85±0.17 | 0.85±1.10  | 1.38 |
| DK-Sor    | DBF | 59  | 0.94           | 1.05±0.07 | 0.15±0.88  | 1.56 | 0.93           | 1.04±0.08 | 0.39±0.96  | 1.73 |
| FI-Hyy    | ENF | 104 | 0.92           | 1.02±0.06 | -0.15±0.37 | 0.91 | 0.81           | 1.05±0.10 | -0.23±0.61 | 1.41 |
| FI-Sii    | WET | 163 | 0.86           | 0.91±0.06 | 0.01±0.15  | 0.49 | 0.69           | 0.68±0.08 | 0.30±0.21  | 0.72 |
| FI-Var    | ENF | 139 | 0.79           | 0.97±0.08 | 0.13±0.38  | 1.05 | 0.74           | 0.96±0.10 | 0.12±0.43  | 1.16 |
| FR-Aur    | CRO | 205 | 0.86           | 1.00±0.06 | -0.14±0.28 | 1.45 | 0.83           | 1.00±0.06 | -0.10±0.32 | 1.61 |
| FR-Bil    | ENF | 168 | 0.89           | 1.05±0.06 | -0.13±0.35 | 1.15 | 0.82           | 1.09±0.08 | -0.35±0.48 | 1.48 |
| FR-EM2    | CRO | 169 | 0.63           | 0.94±0.11 | 0.62±0.75  | 2.97 | 0.6            | 0.86±0.11 | 1.03±0.74  | 3.08 |
| FR-Fon    | DBF | 210 | 0.95           | 1.01±0.03 | -0.20±0.25 | 0.97 | 0.95           | 1.02±0.03 | -0.34±0.28 | 1.06 |
| FR-Hes    | DBF | 74  | 0.84           | 1.00±0.10 | -0.70±0.98 | 2.07 | 0.81           | 1.08±0.12 | -1.43±1.14 | 2.24 |
| FR-LGt    | WET | 239 | 0.93           | 1.03±0.04 | -0.34±0.19 | 0.82 | 0.86           | 1.01±0.05 | -0.45±0.28 | 1.15 |
| FR-Mej    | CRO | 120 | 0.82           | 0.98±0.09 | 0.21±0.74  | 2.44 | 0.74           | 1.09±0.12 | -0.34±0.95 | 2.89 |
| GF-Guy    | EBF | 146 | 0.80           | 0.99±0.53 | 0.21±0.96  | 1.18 | 0.72           | 1.00±0.10 | 0.35±1.20  | 1.42 |
| IT-BCi    | CRO | 69  | 0.22           | 1.16±0.53 | 0.94±5.08  | 5.98 | 0.22           | 0.61±0.28 | 5.31±3.23  | 5.98 |
| IT-Cp2    | EBF | 42  | 0.38           | 0.65±0.27 | 3.89±2.51  | 1.25 | 0.27           | 0.58±0.31 | 4.85±2.73  | 1.36 |
| IT-Lsn    | OSH | 317 | 0.91           | 1.02±0.04 | -0.09±0.22 | 0.99 | 0.88           | 1.01±0.04 | 0.01±0.24  | 1.10 |
| IT-SR2    | ENF | 160 | 0.60           | 0.96±0.12 | 0.55±1.02  | 2.04 | 0.56           | 1.08±0.15 | -0.08±1.18 | 2.12 |

| IT-Tor           | GRA | 134 | 0.79           | 0.97±0.09 | 0.19±0.43  | 1.60                | 0.75           | 1.00±0.10 | 0.13±0.49  | 1.74 |
|------------------|-----|-----|----------------|-----------|------------|---------------------|----------------|-----------|------------|------|
| NL-Loo           | ENF | 47  | 0.77           | 1.11±0.18 | -0.46±1.32 | 1.30                | 0.66           | 1.19±0.25 | -0.55±1.73 | 1.58 |
| SE-Deg           | WET | 143 | 0.38           | 0.37±0.08 | 0.56±0.13  | 0.53                | 0.41           | 0.34±0.07 | 0.49±0.14  | 0.52 |
| SE-Htm           | ENF | 167 | 0.78           | 1.02±0.08 | -0.03±0.63 | 1.52                | 0.70           | 1.04±0.10 | -0.17±0.78 | 1.77 |
| SE-Nor           | ENF | 144 | 0.87           | 0.97±0.06 | 0.15±0.41  | 1.05                | 0.79           | 0.99±0.09 | 0.16±0.55  | 1.33 |
| SE-Svb           | ENF | 199 | 0.92           | 1.01±0.04 | 0.00±0.02  | 0.91                | 0.86           | 1.05±0.06 | -0.21±0.34 | 1.15 |
| <b>RF-SIF-VI</b> |     |     |                |           |            | <b>RF-SIF-R-PFT</b> |                |           |            |      |
| Site name        | PFT | N   | R <sup>2</sup> | Slope     | Intercept  | RMSE                | R <sup>2</sup> | Slope     | Intercept  | RMSE |
| BE-Bra           | MF  | 55  | 0.60           | 0.85±0.19 | 1.18±1.53  | 1.76                | 0.72           | 0.97±0.16 | 0.14±1.34  | 1.47 |
| BE-Lcr           | CRO | 124 | 0.85           | 1.08±0.08 | -0.13±0.68 | 1.77                | 0.91           | 1.05±0.06 | -0.33±0.53 | 1.39 |
| BE-Lon           | CRO | 111 | 0.83           | 1.12±0.10 | -0.54±0.82 | 2.72                | 0.89           | 1.08±0.07 | -0.36±0.65 | 2.22 |
| BE-Vie           | ENF | 41  | 0.68           | 0.95±0.21 | 0.13±1.45  | 1.42                | 0.76           | 1.05±0.19 | -0.61±1.32 | 1.23 |
| CH-Dav           | ENF | 95  | 0.72           | 0.85±0.11 | 0.16±0.46  | 1.05                | 0.77           | 0.88±0.10 | 0.02±0.42  | 0.96 |
| CZ-BK1           | ENF | 23  | 0.42           | 1.04±0.55 | 1.68±4.24  | 2.90                | 0.68           | 1.30±0.40 | -1.21±3.40 | 2.15 |
| CZ-Lnz           | MF  | 62  | 0.75           | 1.11±0.16 | -0.34±1.54 | 2.11                | 0.87           | 1.16±0.12 | -0.90±1.12 | 1.55 |
| CZ-Wet           | WET | 54  | 0.69           | 1.13±0.21 | -0.59±1.42 | 2.42                | 0.83           | 1.11±0.14 | -0.34±0.96 | 1.81 |
| DE-Geb           | CRO | 48  | 0.81           | 0.99±0.14 | 0.31±1.15  | 2.40                | 0.88           | 1.05±0.12 | 0.15±0.92  | 1.92 |
| DE-Gri           | GRA | 169 | 0.65           | 1.03±0.12 | -0.37±0.77 | 2.16                | 0.79           | 1.13±0.09 | -0.84±0.59 | 1.69 |
| DE-Hai           | DBF | 161 | 0.83           | 0.99±0.07 | -0.72±0.54 | 1.91                | 0.88           | 1.02±0.06 | -0.48±0.43 | 1.58 |
| DE-HoH           | DBF | 183 | 0.87           | 1.09±0.06 | -0.52±0.52 | 1.88                | 0.90           | 1.03±0.05 | -0.17±0.43 | 1.61 |
| DE-Hzd           | DBF | 61  | 0.75           | 1.07±0.16 | -0.67±1.06 | 1.81                | 0.86           | 1.09±0.11 | -0.34±0.71 | 1.34 |
| DE-Kli           | CRO | 177 | 0.71           | 1.03±0.10 | -1.15±0.63 | 2.49                | 0.84           | 1.07±0.07 | -1.07±0.44 | 1.84 |
| DE-RuR           | GRA | 61  | 0.58           | 0.97±0.22 | -0.01±1.81 | 2.37                | 0.61           | 1.07±0.22 | 0.02±1.69  | 2.28 |
| DE-RuS           | CRO | 148 | 0.72           | 1.05±0.11 | 0.77±0.91  | 3.62                | 0.75           | 0.98±0.09 | 0.84±0.85  | 3.45 |
| DE-RuW           | ENF | 46  | 0.36           | 0.74±0.30 | 2.53±2.24  | 2.12                | 0.57           | 0.97±0.26 | 0.54±2.00  | 1.74 |
| DE-Tha           | ENF | 52  | 0.55           | 0.74±0.19 | 1.32±1.31  | 1.63                | 0.69           | 0.93±0.18 | 0.34±1.16  | 1.35 |
| DK-Sor           | DBF | 59  | 0.91           | 1.06±0.09 | 0.58±1.10  | 1.98                | 0.93           | 1.04±0.08 | 0.34±0.95  | 1.71 |
| FI-Hyy           | ENF | 104 | 0.74           | 1.06±0.12 | -0.17±0.73 | 1.65                | 0.81           | 1.06±0.10 | -0.35±0.62 | 1.41 |
| FI-Sii           | WET | 163 | 0.68           | 0.64±0.07 | 0.27±0.21  | 0.73                | 0.79           | 0.89±0.07 | 0.10±0.18  | 0.60 |
| FI-Var           | ENF | 139 | 0.67           | 0.90±0.11 | 0.28±0.50  | 1.32                | 0.73           | 0.94±0.10 | 0.14±0.44  | 1.18 |
| FR-Aur           | CRO | 205 | 0.79           | 0.99±0.07 | -0.18±0.36 | 1.80                | 0.83           | 0.99±0.06 | -0.06±0.32 | 1.62 |
| FR-Bil           | ENF | 168 | 0.71           | 1.05±0.10 | -0.05±0.62 | 1.87                | 0.82           | 1.10±0.08 | -0.57±0.49 | 1.47 |
| FR-EM2           | CRO | 169 | 0.55           | 0.85±0.12 | 1.09±0.80  | 3.25                | 0.60           | 0.86±0.11 | 1.05±0.74  | 3.07 |
| FR-Fon           | DBF | 210 | 0.87           | 1.00±0.05 | -0.22±0.44 | 1.63                | 0.95           | 1.02±0.03 | -0.29±0.27 | 1.03 |
| FR-Hes           | DBF | 74  | 0.61           | 1.01±0.19 | -0.87±1.72 | 3.18                | 0.81           | 1.07±0.12 | -1.24±1.12 | 2.22 |
| FR-LGt           | WET | 239 | 0.74           | 0.90±0.07 | -0.38±0.40 | 1.53                | 0.88           | 1.06±0.05 | -0.39±0.25 | 1.05 |
| FR-Mej           | CRO | 120 | 0.68           | 1.07±0.13 | -0.37±1.09 | 3.20                | 0.75           | 1.08±0.11 | -0.28±0.92 | 2.81 |
| GF-Guy           | EBF | 146 | 0.54           | 0.89±0.14 | 2.07±1.51  | 1.81                | 0.75           | 1.05±0.10 | -0.36±1.17 | 1.33 |
| IT-BCi           | CRO | 69  | 0.22           | 0.63±0.29 | 5.16±3.33  | 6.00                | 0.21           | 0.60±0.28 | 5.46±3.24  | 6.02 |
| IT-Cp2           | EBF | 42  | 0.12           | 0.35±0.29 | 7.13±2.42  | 1.49                | 0.32           | 0.65±0.31 | 3.95±2.84  | 1.31 |
| IT-Lsn           | OSH | 317 | 0.83           | 0.98±0.05 | 0.21±0.29  | 1.33                | 0.89           | 1.02±0.04 | -0.06±0.24 | 1.08 |
| IT-SR2           | ENF | 160 | 0.38           | 1.02±0.20 | 0.80±1.51  | 2.52                | 0.59           | 1.11±0.15 | -0.34±1.16 | 2.07 |
| IT-Tor           | GRA | 134 | 0.71           | 0.98±0.11 | 0.19±0.53  | 1.88                | 0.76           | 0.99±0.10 | 0.08±0.49  | 1.74 |
| NL-Loo           | ENF | 47  | 0.48           | 1.05±0.33 | 0.61±2.14  | 1.96                | 0.69           | 1.22±0.24 | -0.98±1.70 | 1.51 |
| SE-Deg           | WET | 143 | 0.38           | 0.22±0.05 | 0.54±0.14  | 0.53                | 0.55           | 0.50±0.07 | 0.34±0.13  | 0.45 |
| SE-Htm           | ENF | 167 | 0.56           | 0.98±0.13 | 0.27±0.99  | 2.15                | 0.72           | 1.08±0.10 | -0.44±0.77 | 1.71 |
| SE-Nor           | ENF | 144 | 0.70           | 0.94±0.10 | 0.61±0.63  | 1.57                | 0.82           | 1.02±0.08 | -0.14±0.52 | 1.24 |
| SE-Svb           | ENF | 199 | 0.68           | 0.99±0.09 | 0.16±0.55  | 1.76                | 0.87           | 1.04±0.06 | -0.26±0.35 | 1.15 |

**Figure S1:** Correlation matrix between explanatory variables and target variable. B<sub>1</sub> to B<sub>16</sub> denote the spectral reflectance of MODIS bands, SIF<sub>d</sub> is the daily TROPOMI sun-induced chlorophyll fluorescence, GPP is the tower-based daily gross primary production, NDVI (normalized difference vegetation index), NIR<sub>v</sub> (near infrared reflectance of vegetation index), and PRI (photochemical reflectance index). The correlation matrix shows strong relations between variables. Based on these observations B<sub>10</sub>, B<sub>12</sub> and B<sub>14</sub> were excluded from the explanatory variables for establishing the RF regression models. Furthermore, B<sub>15</sub> and B<sub>16</sub> were excluded from the analyses due to many missing values that they contained.

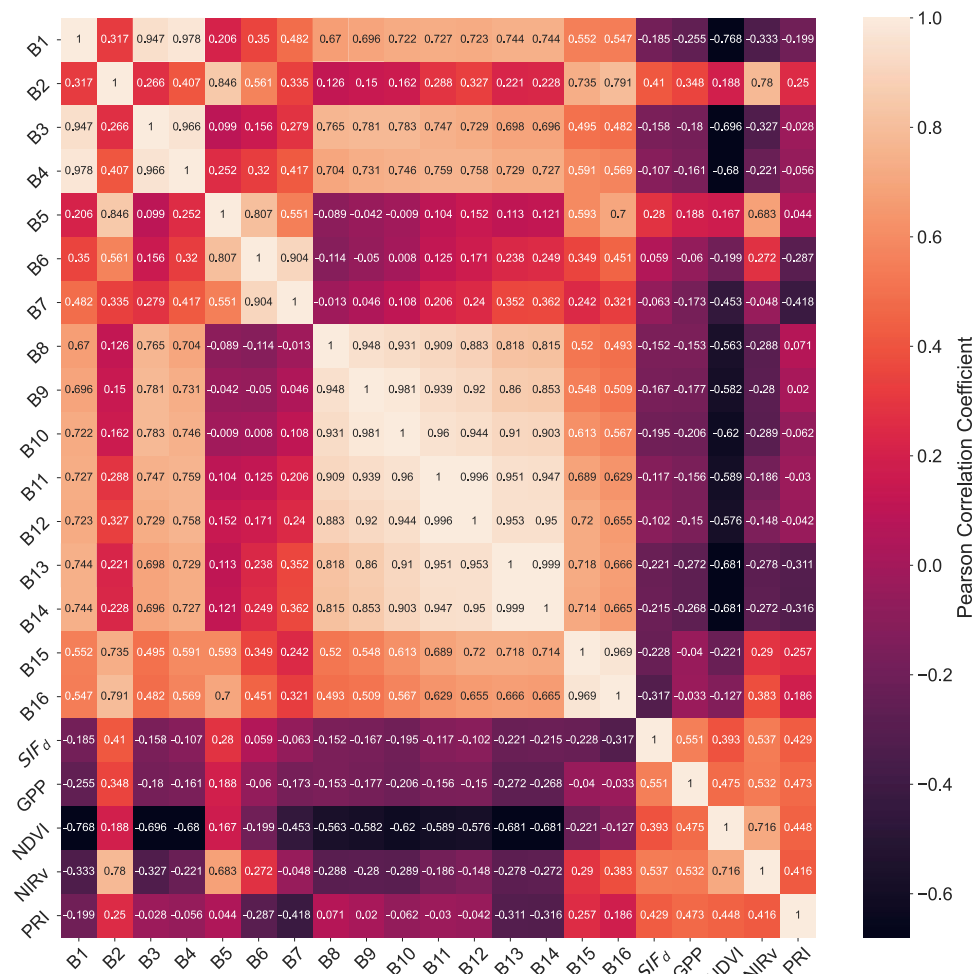

**Figure S2:** Comparison between RF models estimated GPP and observed tower-based GPP across all ICOS flux tower sites. Overall, our RF models show a high explanation of GPP variability across different vegetation types. However, the RF-SIF-VI shows some limits in some sites in predicting tower-based GPP as it overestimates (for instance at *SE-Deg*) and underestimates (for instance at *IT-Cp2*) tower-based GPP. The color code represents the different RF GPP predictions and the observed GPP: Red color stands for RF-SIF-R, green for RF-SIF-R-PFT, blue for RF-R, Cyan for RF-SIF-VI, and black for the observed tower-based GPP.

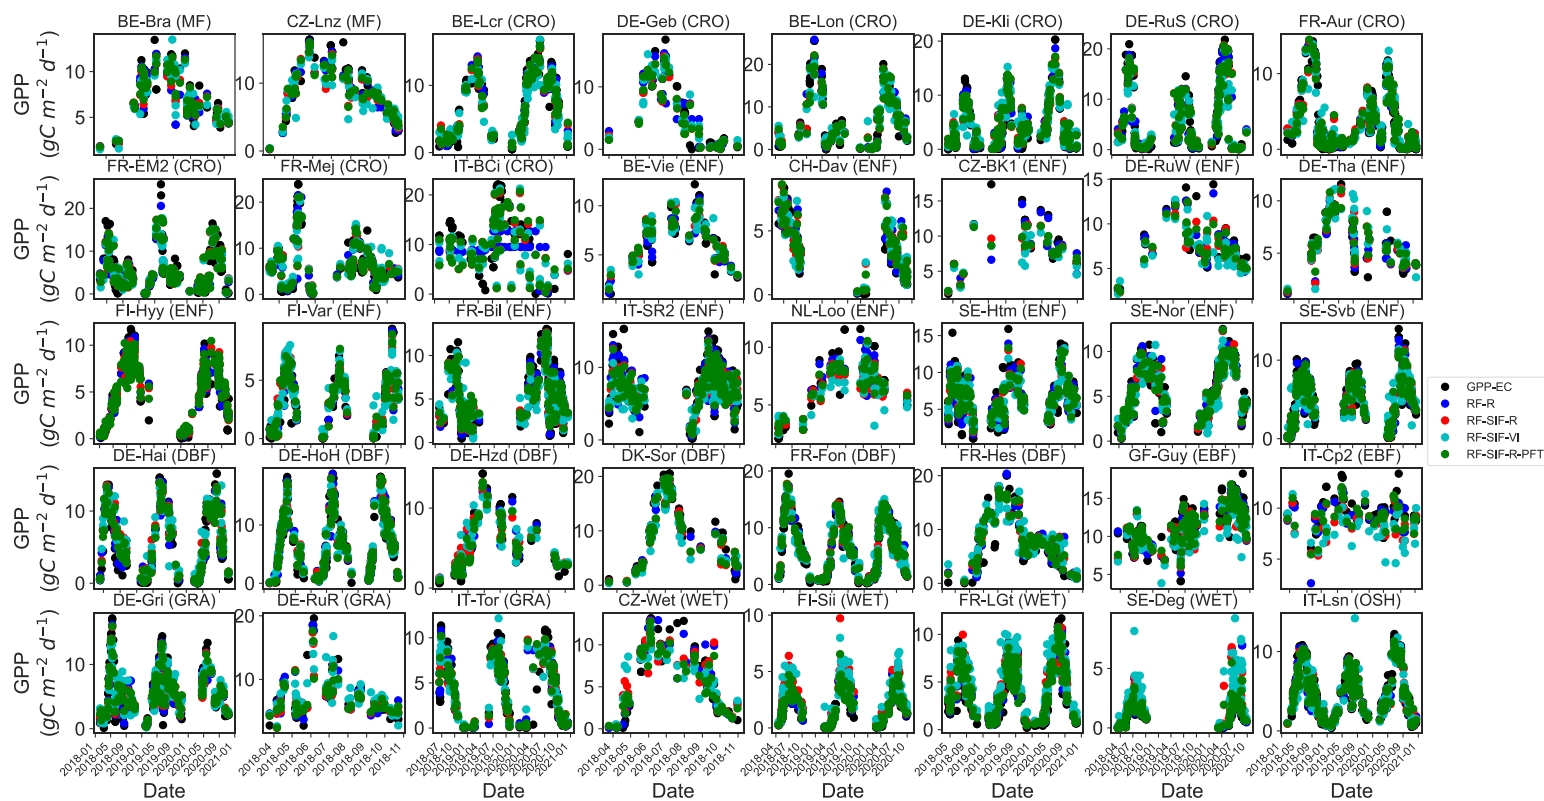



**Figure S3-a RF-R:** Scatterplots between tower-based GPP and RF-R predicted GPP of each site. The  $R^2$  represents the coefficient of determination of the linear agreement between observed GPP and predicted GPP. The color code represents the eight different plant functional types encountered in the study sites: Red color stands for CRO (croplands), green for DBF (deciduous broadleaf forests), yellow for EBF (evergreen broadleaf forests), magenta for ENF (evergreen needleleaf forests), blue for GRA (grasslands), Cyan for MF (mixed forests), lime for OSH (open shrubland), and dimgrey for WET (wetland). The shaded area depicted in each line is the 95% confidence interval of the linear relationships between  $SIF_d$  and GPP.

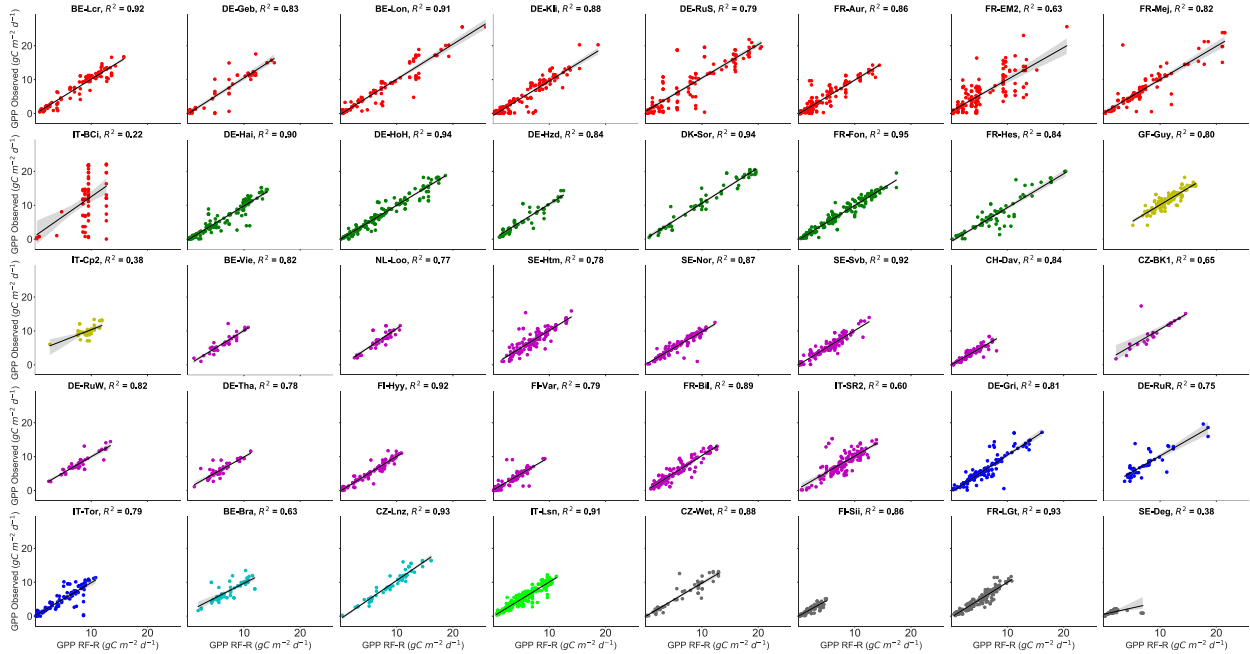

**Figure S3-b RF-R:** Scatterplots of the tower-based GPP against RF-R predicted GPP based on each PFT: mixed forests (MF), croplands (CRO), evergreen needleleaf forests (ENF), deciduous broadleaf forests (DBF), evergreen broadleaf forests (EBF), grasslands (GRA), open shrublands (OSH), and wetlands (WET) at daily timescale. The  $R^2$  represents the coefficient of determination of the relationship between observed GPP and predicted GPP.  $p$  denotes the statistically significant level of the linear relationships. The shaded area depicted in each line is the 95% confidence interval of the linear relationships between GPP predicted and GPP observed.

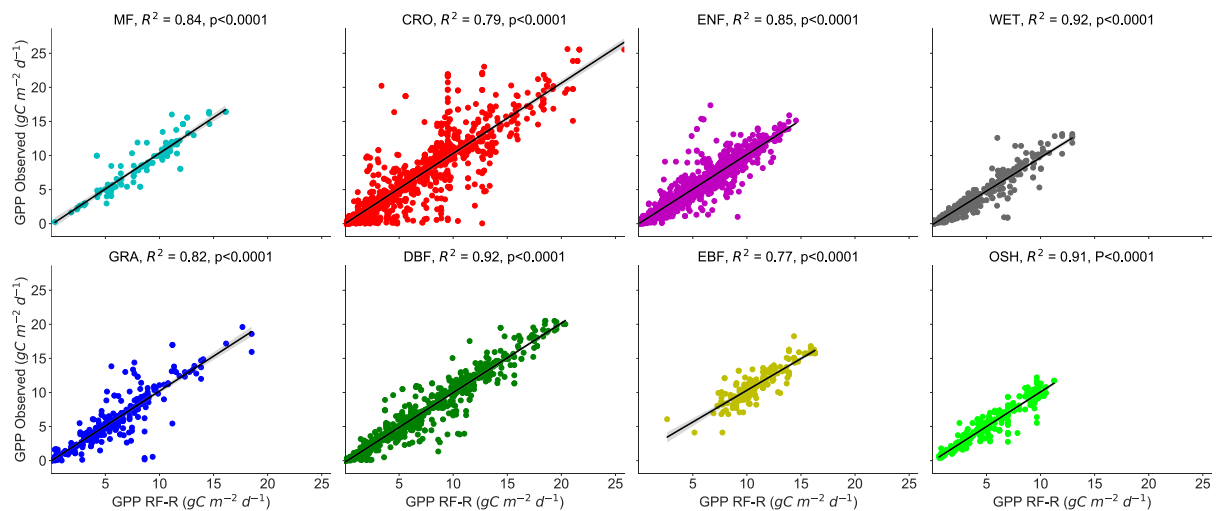

**Figure S4-a RF-SIF-VI:** Scatterplots between tower-based GPP and RF-SIF-VI predicted GPP for each site. The  $R^2$  represents the coefficient of determination of the linear agreement between observed GPP and predicted GPP. The color code represents

the eight different vegetation types encountered in the study sites: Red color stands for CRO (croplands), green for DBF (deciduous broadleaf forests), yellow for EBF (evergreen broadleaf forests), magenta for ENF (evergreen needleleaf forests), blue for GRA (grasslands), Cyan for MF (mixed forests), lime for OSH (open shrubland), and dimgrey for WET (wetland). The shaded area depicted in each line is the 95% confidence interval of the linear relationships between  $SIF_d$  and GPP.

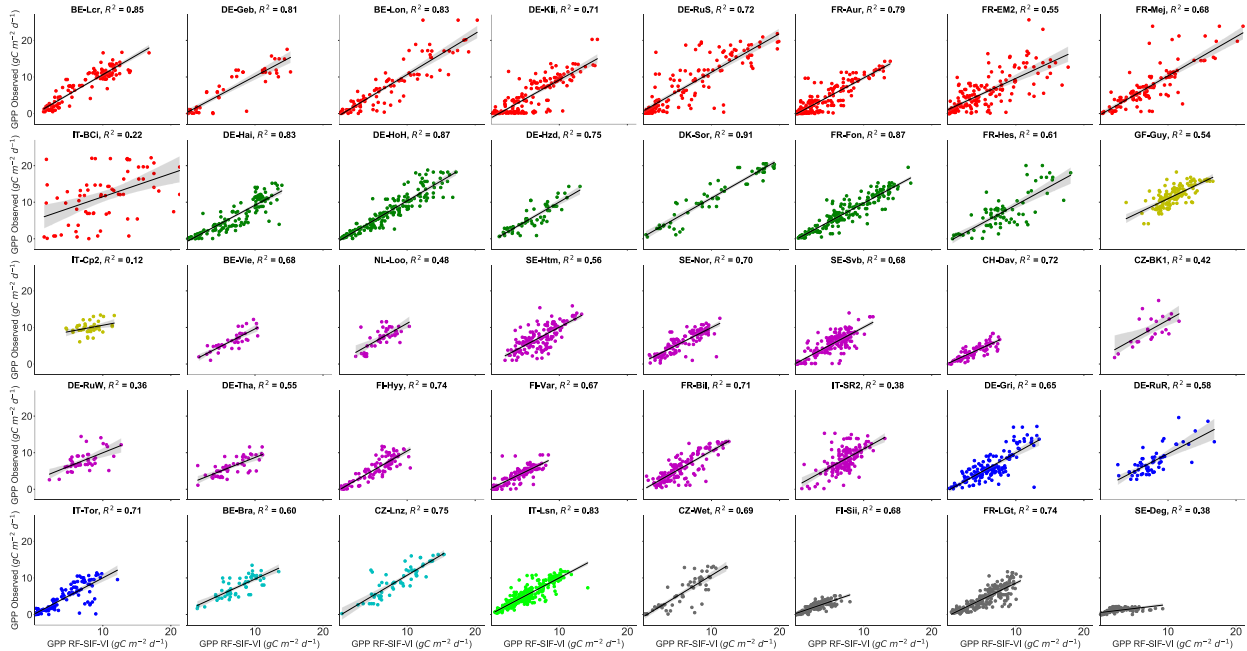

**Figure S4-b RF-SIF-VI:** Scatterplots of the tower-based GPP against RF-SIF-VI predicted GPP for each plant functional types: mixed forests (MF), croplands (CRO), evergreen needleleaf forests (ENF), deciduous broadleaf forests (DBF), evergreen broadleaf forests (EBF), grasslands (GRA), open shrublands (OSH), and wetlands (WET) at daily timescale. The  $R^2$  represents the coefficient of determination of the relationship between observed GPP and predicted GPP.  $p$  denotes the statistically significant level of the linear relationships. The shaded area depicted in each line is the 95% confidence interval of the linear relationships between GPP predicted and GPP observed. The strongest correlations between observed and predicted GPP are observed in DBF and OSH vegetation types, while the lowest are recorded in EBF and ENF.

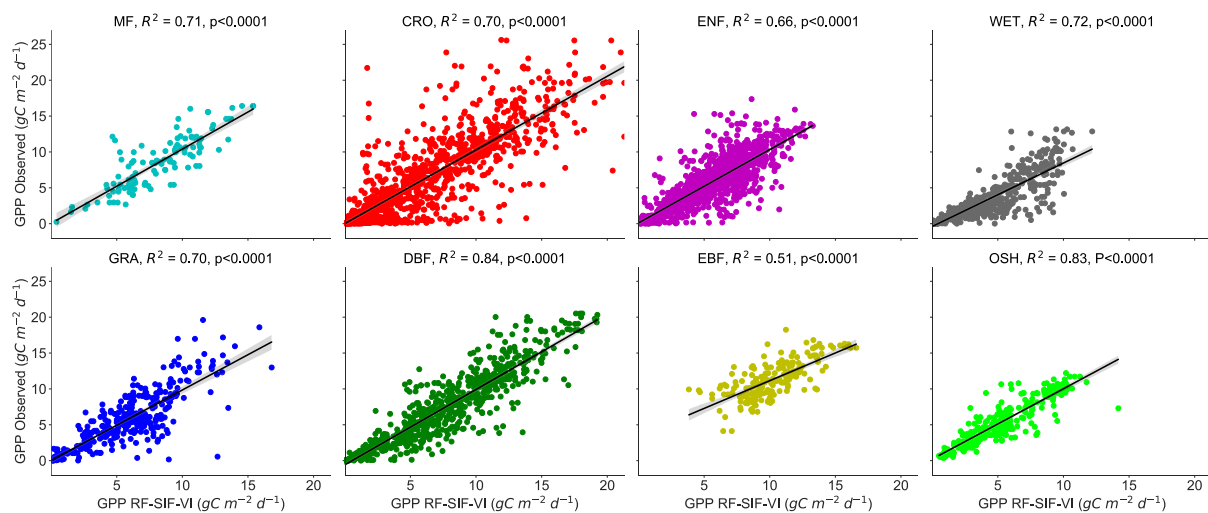

**Figure S5-a RF-SIF-R-PFT:** Scatterplots between tower-based GPP and RF-SIF-R-PFT predicted GPP for each site. The  $R^2$  represents the coefficient of determination of the linear agreement between predicted GPP and observed GPP. The color code

represents the eight different vegetation types encountered in the study sites: Red color stands for CRO (croplands), green for DBF (deciduous broadleaf forests), yellow for EBF (evergreen broadleaf forests), magenta for ENF (evergreen needleleaf forests), blue for GRA (grasslands), Cyan for MF (mixed forests), lime for OSH (open shrubland), and dimgrey for WET (wetland). The shaded area depicted in each line is the 95% confidence interval of the linear relationships between  $SIF_d$  and GPP.

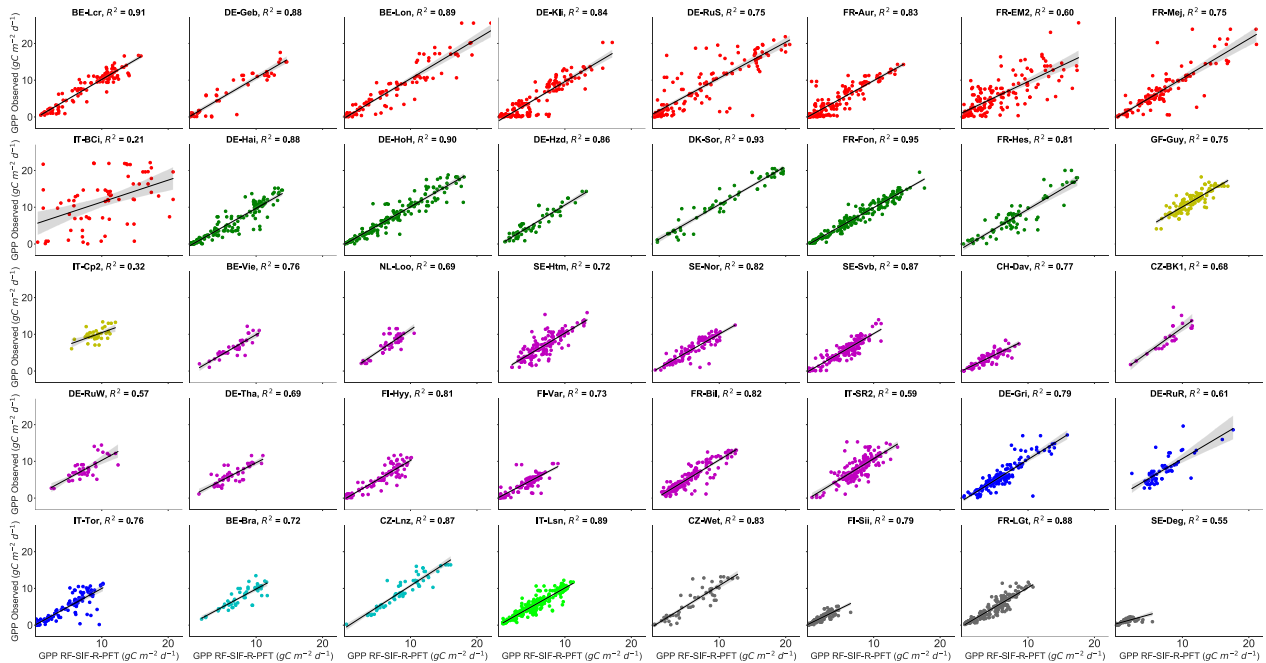

**Figure S5-b RF-SIF-R-PFT:** Scatterplots of the ICOS tower-based GPP against RF-SIF-R-PFT predicted GPP for each plant functional type: mixed forests (MF), croplands (CRO), evergreen needleleaf forests (ENF), deciduous broadleaf forests (DBF), evergreen broadleaf forests (EBF), grasslands (GRA), open shrublands (OSH), and wetlands (WET) at daily timescale. The  $R^2$  represents the coefficient of determination of the relationship between observed GPP and predicted GPP.  $p$  denotes the statistically significant level of the linear relationships. The shaded area depicted in each line is the 95% confidence interval of the linear relationships between GPP predicted and GPP observed.

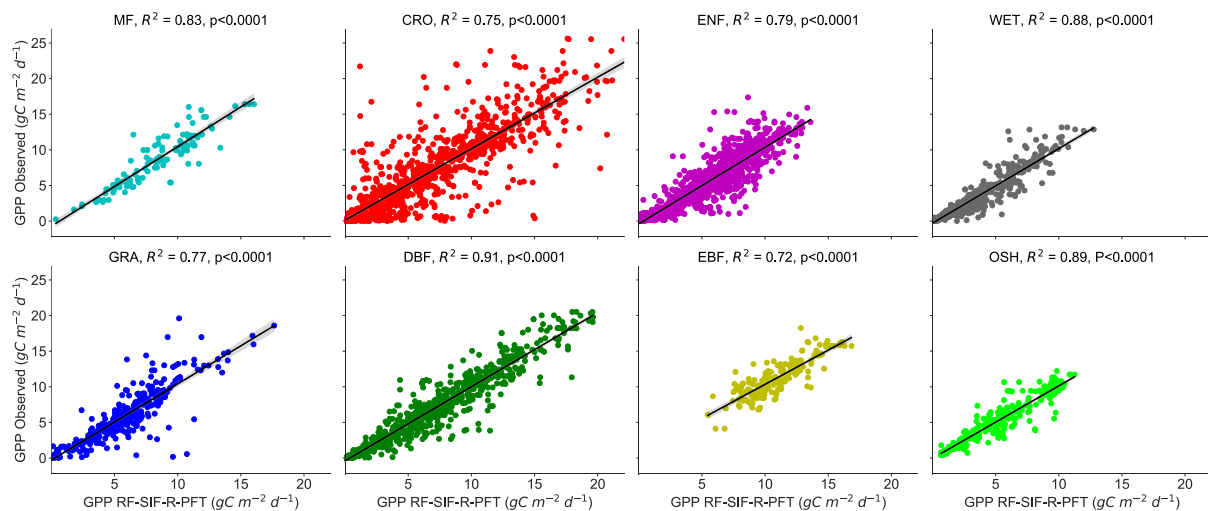

Supplement: Supplementary file 1 [file egusphere-2022-640-supplement.pdf]
